# Supplementary material
Source: publisher site journal article supplement (https://www.dovepress.com/article/302288)
Supplement: Supplementary file 1 [file get_supplementary_file.php]

## Supporting Information

# A Combined Antitumor Strategy Mediated by a New Targeted Nanosystem to Hepatocellular Carcinoma

Dina Farinha<sup>a,b</sup>, Michael Migawa<sup>c</sup>, Ana Bela Sarmiento-Ribeiro<sup>a,d,e</sup>, Henrique Faneca<sup>a,b,\*</sup>

<sup>a</sup>CNC - Center for Neuroscience and Cell Biology (CNC), University of Coimbra, Coimbra, Portugal

<sup>b</sup>Institute for Interdisciplinary Research (IIIUC), University of Coimbra, Coimbra, Portugal

<sup>c</sup>Ionis Pharmaceuticals Inc, Carlsbad, USA

<sup>d</sup>Laboratory of Oncobiology and Hematology (LOH) and University Clinic of Hematology, Faculty of Medicine, University of Coimbra, Coimbra, Portugal

<sup>e</sup>Clinical Hematology Department, Centro Hospitalar Universitário de Coimbra (CHUC), Coimbra, Portugal

\*Corresponding author:

Henrique Faneca

Center for Neuroscience and Cell Biology, University of Coimbra, 3004-504 Coimbra, Portugal.

E-mail: henrique@cnc.uc.pt

Tel.: +351-239-820-190; fax: +351-239-853-607

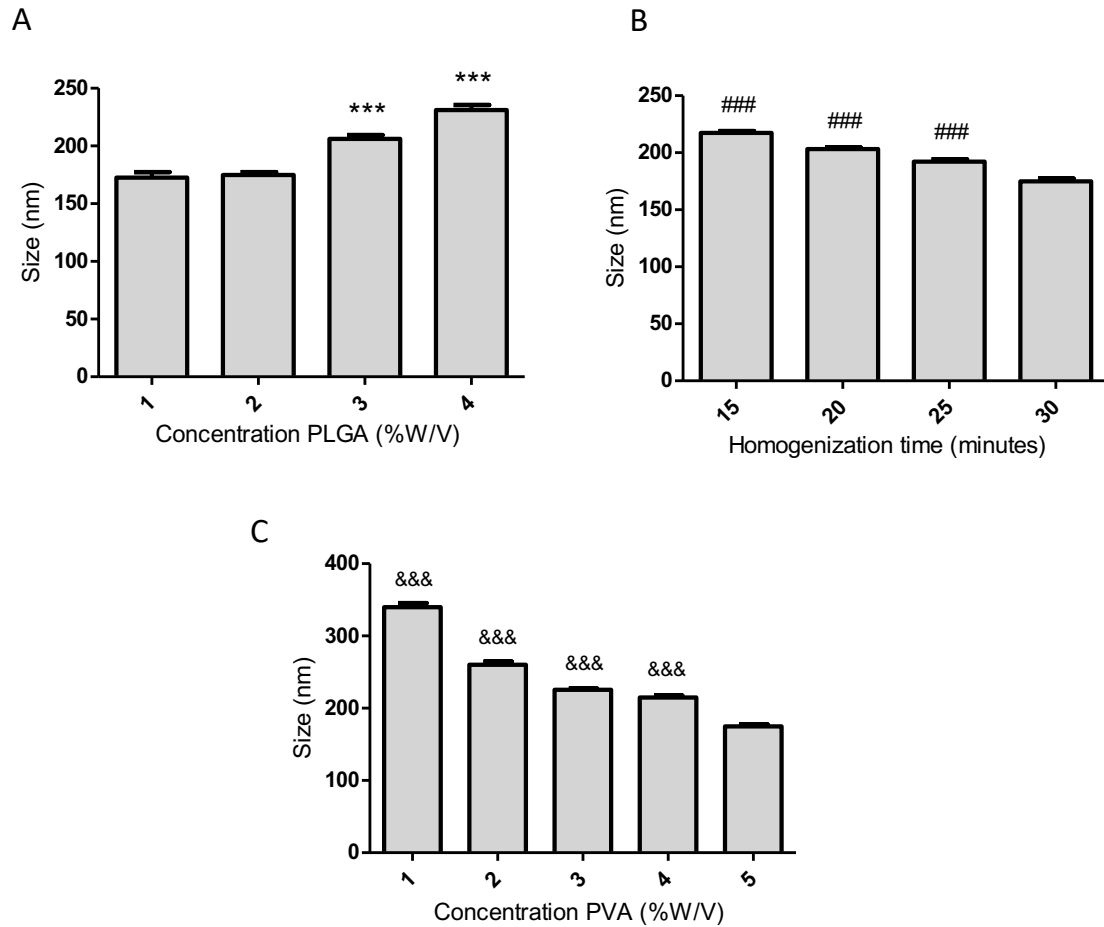

**Figure S1** Size optimization of PLGA nanoparticles. (A) Effect of PLGA polymer concentration on the size of nanoparticles, maintaining the PVA concentration at 5 % and homogenization time of 30 minutes. (B) Effect of homogenization time on the size of nanoparticles, maintaining the concentration of PLGA at 2 % and PVA at 5 %. (C) Effect of surfactant concentration on the size of nanoparticles, maintaining the PLGA concentration at 2 % and the homogenization time of 30 minutes. Data are expressed as mean  $\pm$  SD obtained from four independent samples (n= 4). (\*\*\*) ( $P < 0.001$ ) Denotes statistically significant difference when compared to PLGA nanoparticles produced with 2 % of PLGA. (###) ( $P < 0.001$ ) Denotes statistically significant difference when compared to PLGA nanoparticles produced after 30 minutes of homogenization. (&&&) ( $P < 0.001$ ) Denotes statistically significant difference when compared to PLGA nanoparticles produced with 5 % of PVA.

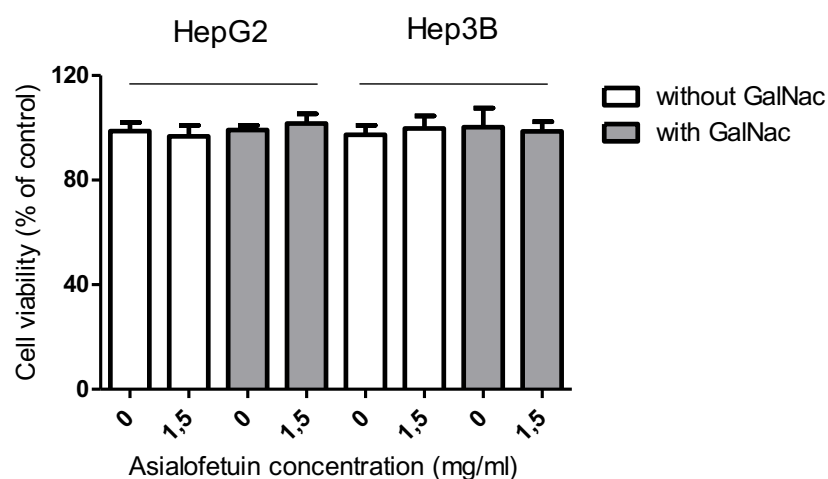

**Figure S2** Evaluation of cytotoxicity of hybrid nanosystems in HepG2 and Hep3B cells in the presence or absence of asialofetuin. Cells were treated with 0.5 µg/ml of HNP, loaded with coumarin-6 and nile red and prepared with or without the GalNAc cluster, in the presence or absence of 1.5 mg/ml asialofetuin for 4 hours. Cell viability is expressed as a percentage of untreated control cells and is the mean  $\pm$  SD obtained from triplicates of three independent experiments (n=3)

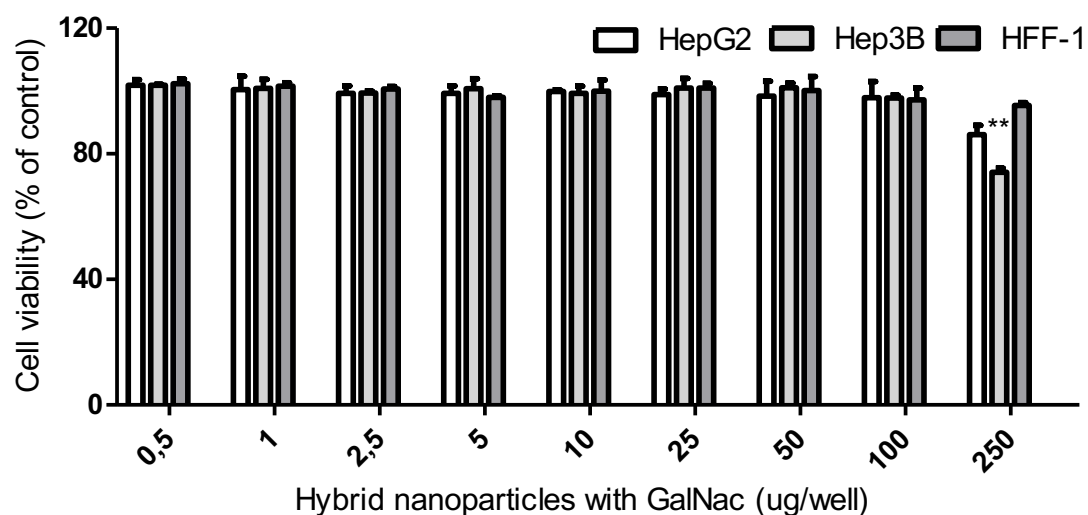

**Figure S3** Cytotoxicity assessment of empty hybrid nanosystems in different cell lines. HepG2, Hep3B and HFF-1 cells were treated with different amounts of HNP (0–250 µg/well) for 72 hours. Data are expressed as mean  $\pm$  SD obtained from triplicates of three independent

experiments (n=3). (\*\*) ( $P < 0.01$ ) Denotes statistically significant difference in the cell viability when compared with HFF-1 cell line treated with the same amount ( $\mu\text{g}/\text{well}$ ) of HNP.

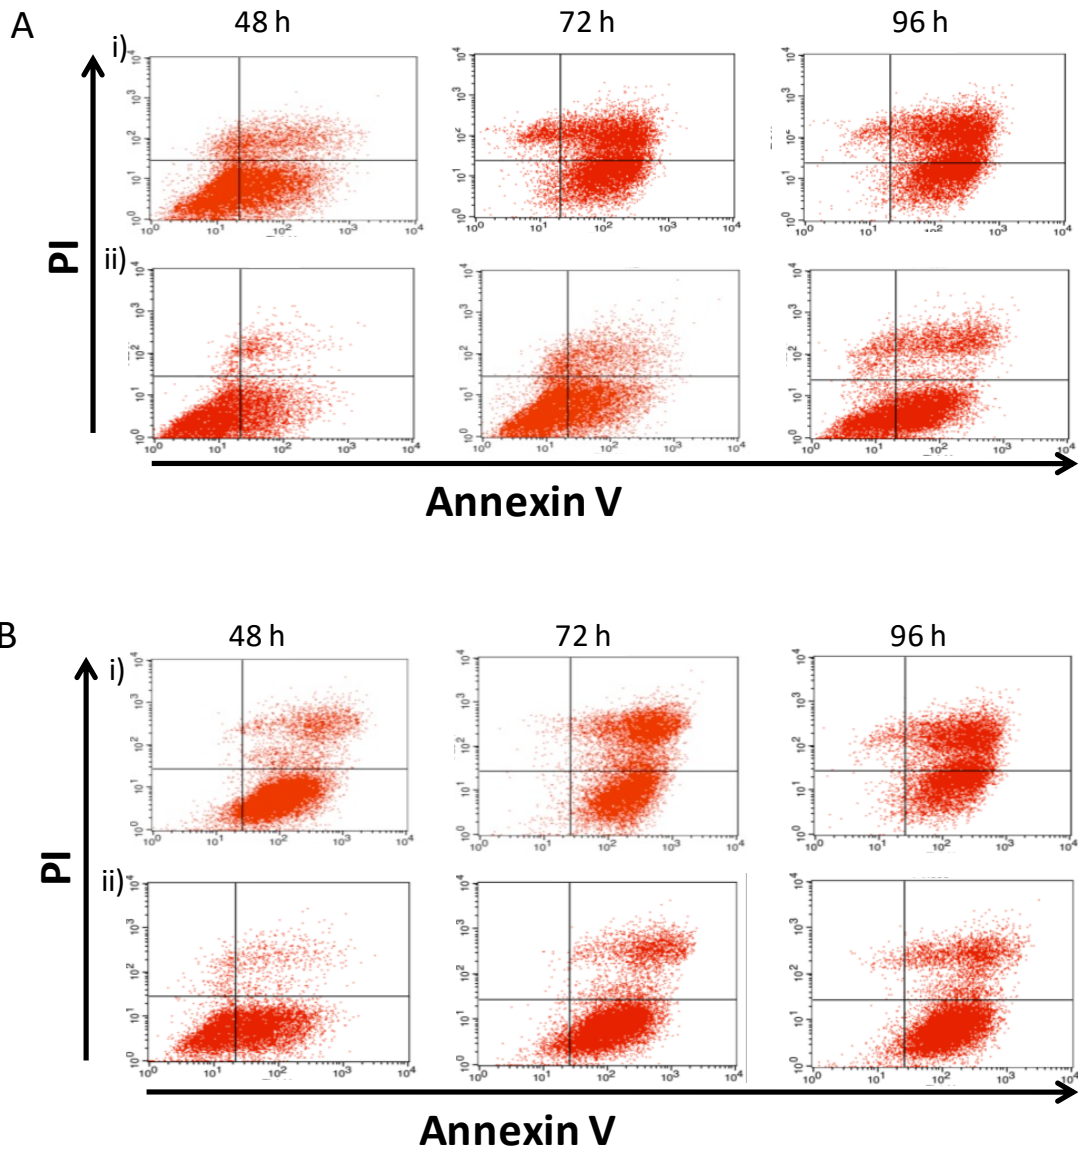

**Figure S4** Apoptosis levels promoted by the therapeutic strategies in HCC cells. HepG2 (A) and Hep3B (B) cells were stained with Annexin V and PI double-staining for 15 min after being treated, for 48, 72 and 96 hours, with: (i) HNP containing sorafenib and selumetinib; or (ii) the combination of both free drugs.

**Table S1** - Optimization of conjugation conditions of GalNAc cluster to hybrid nanosystems.

| Optimization of Conjugation Conditions |           |                  |                |
|----------------------------------------|-----------|------------------|----------------|
| DSPE-PEG Concentration                 | % acetone | Temperature (°C) | Conversion (%) |
| 1.1mM                                  | 50%       | 25               | ---            |
| 1.1mM                                  | 30%       | 25               | 93%            |
| 1.1mM                                  | 30%       | 35               | 90%            |
| 1.1mM                                  | 20%       | 25               | 30%            |

DSPE-PEG(2000)-amine dissolved in 0.1 M sodium tetraborate, pH 8.5, and 3 equiv of GalNAc PFP ester dissolved in acetone were mixed for overnight.
